# Supplementary material
Source: publisher site journal article supplement (https://www.dovepress.com/article/383237)
Supplement: Supplementary file 1 [file get_supplementary_file.php]

Supporting information

Multi-modal imaging monitored M2 macrophage targeting sono-responsive nanoparticles to combat MRSA deep infections

Sijie Chen **1,2 #**, Jiahao Wang **3,4,5,6 #**, Kui Tang **1,2**, Haiqin Liao **1,2**, Yan Xu **1,2**, Long Wang **3,4,5,6**, Chengcheng Niu **1,2 ***

***1** Department of Ultrasound Diagnosis, The Second Xiangya Hospital, Central South University, Changsha, Hunan 410011, China

***2** Research Center of Ultrasonography, The Second Xiangya Hospital, Central South University, Changsha, Hunan 410011, China

**3**Department of Orthopedics, Xiangya Hospital, Central South University, Changsha, Hunan 410008, China

4 Hunan Engineering Research Center of Biomedical Metal and Ceramic Implants, Xiangya Hospital, Central South University, Changsha, China

5 National Clinical Research Center for Geriatric Disorders, Xiangya Hospital, Central South University, Changsha, China

6 Hunan key laboratary of aging biology, Xiangya Hospital, Central South University, Changsha, China

**Address all correspondence to:** Chengcheng Niu, Department of Ultrasound Diagnosis and Research Center of Ultrasonography, The Second Xiangya Hospital, Central South University, Changsha, Hunan, China, 410011; E-mail: [niuchengcheng@csu.edu.cn](mailto:niuchengcheng@csu.edu.cn)

# These authors have contributed equally to this work.


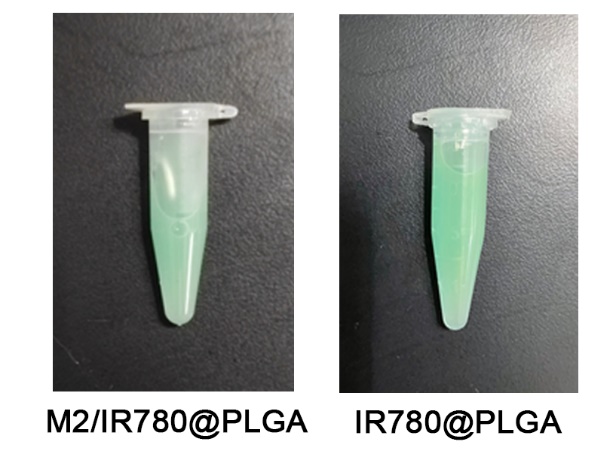


**Fig. S1.** The appearance of M2/IR780@PLGA nanoparticles and IR780@PLGA nanoparticles.





**Fig. S2.** UV-vis-NIR absorption spectra of free IR780 and M2/IR780@PLGA nanoparticles.





**Fig. S3**.The standard curve of IR780.


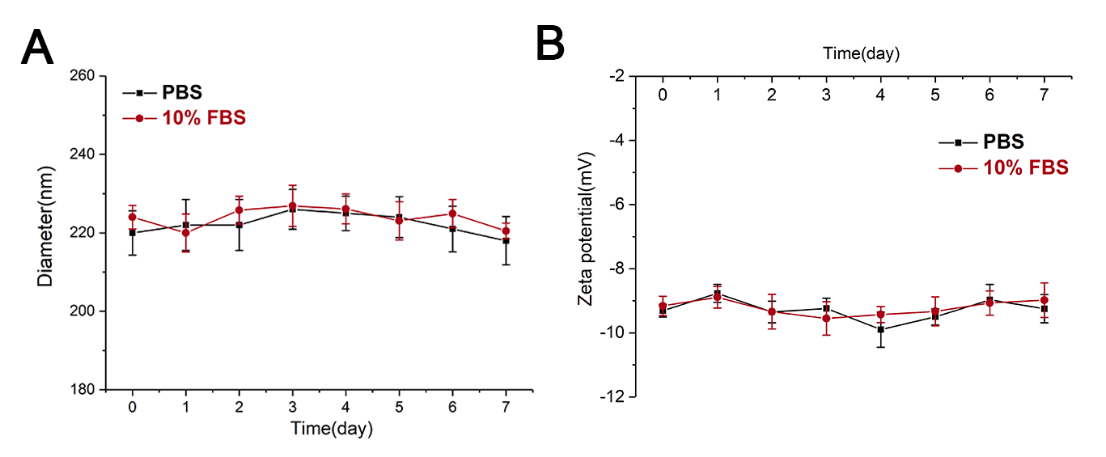


**Fig. S4.** (A) Size and (B) zeta potential distributions of M2/IR780@PLGA nanoparticles in 1×PBS or 10% FBS for 7 days.


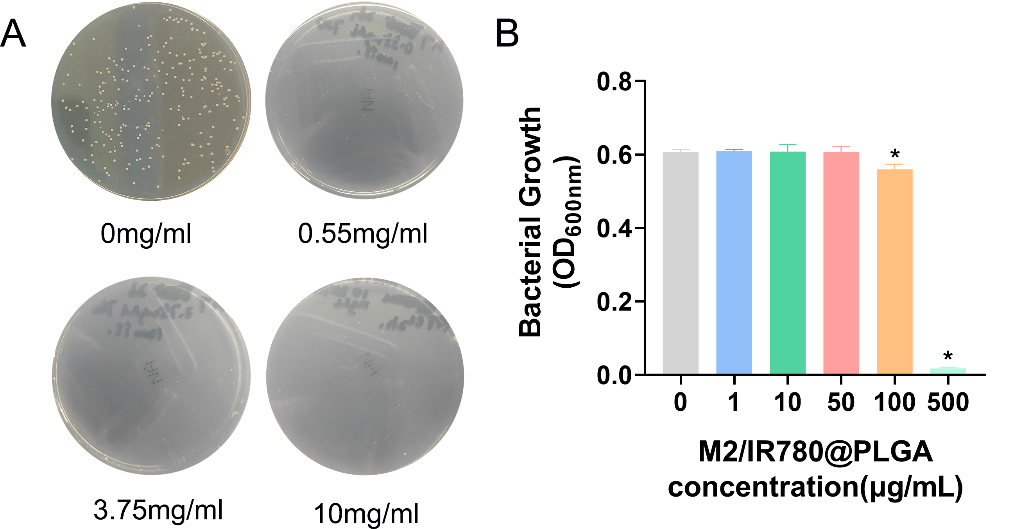


**Fig. S5**. (A) Plate counting results of *ATCC 43300* strain treated with M2/IR780@PLGA nanoparticles at high concentrations more than 500 μg/mL. (B) MIC tests results of ATCC 43300 strain treated with M2/IR780@PLGA nanoparticles at concentrations lower than 500 μg/mL.


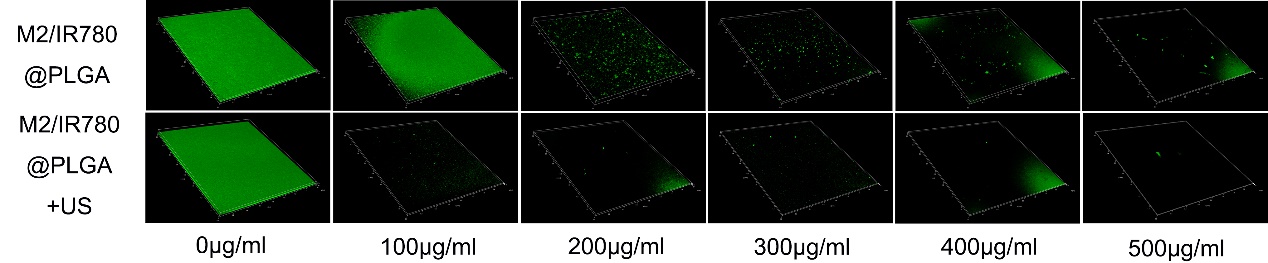


**Fig. S6.** Live staining images of MRSA after different treatments by CLSM.





**Fig. S7.** Changes of mice body weight during different treatments.


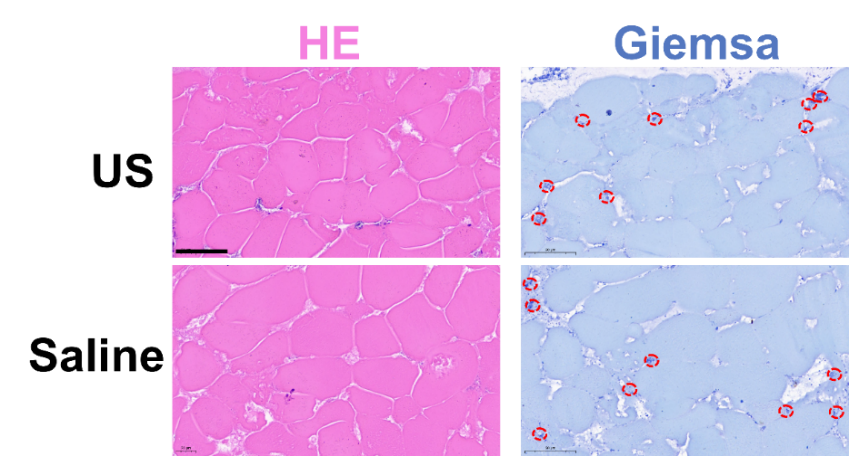


**Fig. S8**. Coagulative necrosis in muscle tissue on HE staining (the large areas of red staining without structure), with abundant bacteria on Giemsa staining (red circle).





**Fig. S9**. Quantification of inflammatory cells in the infection area. Data are expressed as means SD (n = 3). Statistical significances were calculated via ANOVA, **p* < 0.05.

**Supplementary Table 1.** Primers used for quantitative real-time polymerase chain reaction.

| | **IL–10-F** | CCAGTACAGCCGGGAAGACA | | --- | --- | | **IL–10-R** | GAAGGCAGTCCGCAGCTCTA | | **CD206-F** | CCTATGAAAATTGGGCTTACGG | | **CD206-R** | CTGACAAATCCAGTTGTTGAGG | |
| --- | --- | --- | --- | --- | --- | --- | --- | --- |
|  |
